# Supplementary material for: Advances and innovations in machine learning-based spectral detection methods for trace organic pollutants
Source: Royal Society of Chemistry journal article supplement (doi:10.1039/d5an00903k), 2025-12-09
Supplement: d5an00903k1.xlsx [file d5an00903k1.xlsx]

## Sheet: Sheet1
Abbreviations	Full Name	Explanation
1D-CNN	One-Dimensional Convolutional Neural Network	A CNN specifically designed to process one-dimensional sequential data, such as spectra.
1D-ResNet	One-Dimensional Residual Network	A type of 1D-CNN that uses skip connections to facilitate the training of much deeper networks.
ANN	Artificial Neural Network	A computing system inspired by the biological neural networks that constitute animal brains.
ASTM	American Society for Testing and Materials	An international standards organization that develops and publishes voluntary consensus technical standards.
AUC	Area Under the Curve	A performance measurement for classification problems at various threshold settings, typically referring to the ROC curve.
CNNs	Convolutional Neural Networks	A class of deep neural networks commonly applied to analyzing visual imagery and sequential data like spectra.
COD	Chemical Oxygen Demand	A water quality measure that indicates the amount of oxygen required to oxidize organic matter in water.
CQDs	Carbon Quantum Dots	A class of carbon nanoparticles with photoluminescence properties.
CV	Coefficient of Variation	A statistical measure of the dispersion of data points in a data series around the mean.
DL	Deep Learning	A subfield of machine learning using multi-layered neural networks to learn complex data representations.
DNN	Deep Neural Network	An artificial neural network with multiple layers between the input and output layers.
DOM	Dissolved Organic Matter	The fraction of organic matter in water that passes through a filter of a given pore size.
DT	Decision Tree	A tree-like model used in decision analysis and machine learning for classification and regression.
DTW	Dynamic Time Warping	An algorithm for measuring similarity between two temporal sequences which may vary in speed or timing.
eARGs	extracellular Antibiotic Resistance Genes	Antibiotic resistance genes that are located outside of bacterial cells, often associated with mobile genetic elements.
ELISA	Enzyme-Linked Immunosorbent Assay	A plate-based assay technique designed for detecting and quantifying substances like peptides or hormones.
FDA	Food and Drug Administration	A federal agency of the United States responsible for protecting public health by ensuring the safety of drugs, medical devices, etc.
FPS	Frames Per Second	A unit that measures display device performance, indicating the number of unique consecutive images (frames) displayed per second.
FTBLS	Fuzzy Tree Broad Learning System	A broad learning system that incorporates fuzzy logic and tree structures.
FTIR	Fourier-Transform Infrared Spectroscopy	A technique used to obtain an infrared spectrum of absorption or emission of a solid, liquid or gas.
GANs	Generative Adversarial Networks	A framework where two neural networks contest with each other to generate new, synthetic data.
GBRT	Gradient Boosting Regression Tree	A machine learning technique for regression and classification problems, which produces a prediction model in the form of an ensemble of decision trees.
GC-MS	Gas Chromatography-Mass Spectrometry	An analytical method that combines gas chromatography and mass spectrometry to identify different substances.
GPU	Graphics Processing Unit	A specialized electronic circuit designed to rapidly manipulate and alter memory to accelerate the creation of images; also used for high-performance computing.
Grad-CAM	Gradient-weighted Class Activation Mapping	A technique for making Convolutional Neural Network (CNN) decisions more interpretable.
HSV	Hue, Saturation, Value	A color model that describes colors in terms of their hue, saturation, and value (brightness).
ICP-MS	Inductively Coupled Plasma Mass Spectrometry	A type of mass spectrometry that is highly sensitive and capable of detecting most elements at trace concentrations.
INT8	8-bit Integer	A data type representing integers using 8 bits, often used in model quantization to reduce size and computational cost.
ISO	International Organization for Standardization	An international standard-setting body composed of representatives from various national standards organizations.
KL Divergence	Kullback–Leibler Divergence	A statistical measure of how one probability distribution diverges from a second, reference probability distribution.
LASSO	Least Absolute Shrinkage and Selection Operator	A regression analysis method that performs both variable selection and regularization.
LC-MS	Liquid Chromatography-Mass Spectrometry	An analytical chemistry technique that combines liquid chromatography with mass spectrometry.
LDA	Linear Discriminant Analysis	A method used in statistics and machine learning to find a linear combination of features that separates classes.
LDIR	Laser Direct Infrared Imaging	An imaging technique that uses infrared light to identify and count microplastics.
LSPR	Localized Surface Plasmon Resonance	The collective oscillation of conduction electrons in metallic nanoparticles, excited by light.
LSTM	Long Short-Term Memory	A type of recurrent neural network (RNN) architecture capable of learning long-term dependencies.
MAPE	Mean Absolute Percentage Error	A measure of prediction accuracy of a forecasting method, expressed as a percentage.
MCU	Microcontroller Unit	A small computer on a single integrated circuit that controls specific operations in an embedded system.
ML	Machine Learning	Algorithms that learn patterns from data to make predictions or decisions without explicit programming.
MMD	Maximum Mean Discrepancy	A kernel-based statistical test used to determine if two samples are from the same distribution.
MVO	Multiverse Optimization	A nature-inspired optimization algorithm based on the concepts of multiverse theory in physics.
NAS	Neural Architecture Search	The process of automating the design of artificial neural networks.
NIR	Near-Infrared Spectroscopy	A spectroscopic method using the near-infrared region of the electromagnetic spectrum.
OPPs	Organophosphorus Pesticides	A group of pesticides that affect the nervous system by disrupting the enzyme that regulates acetylcholine.
OTA	Over-The-Air	A method of distributing new software, configuration settings, or encryption keys to devices like mobile phones and embedded systems.
PAHs	Polycyclic Aromatic Hydrocarbons	A class of chemicals that occur naturally in coal, crude oil, and gasoline, and are also pollutants.
PCA	Principal Component Analysis	A statistical procedure that uses orthogonal transformation to convert correlated variables into linearly uncorrelated principal components.
PLSR	Partial Least Squares Regression	A statistical method that finds a linear regression model by projecting the predicted variables and the observable variables to a new space.
RF	Random Forest	An ensemble learning method that uses multiple decision trees for classification or regression.
RL	Reinforcement Learning	A machine learning training method based on rewarding desired behaviors and/or punishing undesired ones.
RMSE	Root Mean Squared Error	A standard way to measure the error of a model in predicting quantitative data.
RMSEP	Root Mean Squared Error of Prediction	The RMSE calculated for a prediction or test set, not used in model training.
RNNs	Recurrent Neural Networks	A type of neural network designed to recognize patterns in sequences of data.
ROI	Region of Interest	A selected subset of data (e.g., in an image or spectrum) defined for a particular purpose.
RPIQ	Ratio of Performance to Interquartile distance	A metric for evaluating the predictive capability of a model, particularly in soil spectroscopy.
SERS	Surface-Enhanced Raman Spectroscopy	A sensitive spectroscopic technique that enhances Raman signals using nanostructured substrates.
SG	Savitzky–Golay Filter	A digital filter that can be applied to a set of digital data points for the purpose of smoothing and differentiation.
SHAP	SHapley Additive exPlanations	A game theoretic approach to explain the output of any machine learning model.
SNR	Signal-to-Noise Ratio	A measure that compares the level of a desired signal to the level of background noise.
SOM	Soil Organic Matter	The organic component of soil, consisting of plant and animal residues at various stages of decomposition.
SSL	Semi-Supervised Learning	A machine learning paradigm that uses both labeled and unlabeled data for training.
SVMs	Support Vector Machines	A supervised learning model used for classification and regression analysis.
SVR	Support Vector Regression	A version of Support Vector Machines (SVM) for regression tasks.
TL	Transfer Learning	A research problem in machine learning that focuses on storing knowledge gained while solving one problem and applying it to a different but related problem.
TOPS	Tera Operations Per Second	A unit of computing performance, representing one trillion operations per second.
t-SNE	t-distributed Stochastic Neighbor Embedding	A machine learning algorithm for visualizing high-dimensional data by giving each datapoint a location in a 2D or 3D map.
UL	Unsupervised Learning	A type of machine learning that finds patterns in data without pre-existing labels.
UV-vis	Ultraviolet-Visible Spectroscopy	A spectroscopic technique that measures the absorption of ultraviolet and visible light by a sample.
VOCs	Volatile Organic Compounds	Organic chemicals that have a high vapor pressure at room temperature, many of which are hazardous air pollutants.
WGAN	Wasserstein Generative Adversarial Network	A type of Generative Adversarial Network (GAN) that uses the Wasserstein distance to improve training stability.
WT	Wavelet Transform	A mathematical tool used for decomposing a signal into different frequency components at different resolutions.
XGBoost	Extreme Gradient Boosting	An optimized distributed gradient boosting library designed to be efficient and flexible.
YOLO	You Only Look Once	A state-of-the-art, real-time object detection system.
